# Supplementary material
Source: publisher figshare collection journal article supplement (https://sage.figshare.com/ndownloader/files/36009488)
Supplement: Supplementary file 1 [file 36009488]

|  | | | **Females** | | |
| --- | --- | --- | --- | --- | --- |
| **Measurement** | **Interval** | **Statistic** | **Cambodian** | **Chinese** | **Vietnamese** |
| Aspartate Aminotransferase Activity  (U/L) | Pretreatment | Mean (95% CI) | 40.2a (38.2-42.7) | 45.8a (43.8-47.8) | 41.9 (39.1-45.2) |
| SD | 19.29 | 27.11 | 17.63 |
| N | 271 | 705 | 115 |
| Median | 37 | 39 | 38 |
| Central 95% | 23-72 | 24-105 | 23-95 |
| Final | Mean (95% CI) | 46.1 (44.1-48.5) | 46.0 (43.8-48.3) | 44.7 (41.1-48.3) |
| SD | 18.86 | 31.67 | 20.38 |
| N | 271 | 722 | 115 |
| Median | 41 | 39 | 39 |
| Central 95% | 24-90 | 23-99 | 20-99 |
| Alanine Aminotransferase Activity (U/L) | Pretreatment | Mean (95% CI) | 49.1 (44.9-55.1) | 49.5 (47.1-53.1) | 41.8 (38.3-45.5) |
| SD | 42.87 | 38.39 | 19.65 |
| N | 271 | 705 | 115 |
| Median | 41 | 44 | 37 |
| Central 95% | 21-127 | 21-101 | 20-93 |
| Final | Mean (95% CI) | 51.7a,b (48.6-55.0) | 47.6a (46.1-49.1) | 45.2b (41.6-48.4) |
| SD | 26.51 | 20.42 | 19.54 |
| N | 271 | 722 | 115 |
| Median | 46 | 43 | 40 |
| Central 95% | 23-122 | 21-108 | 24-111 |
| Alkaline Phosphatase Activity  (U/L) | Pretreatment | Mean (95% CI) | 439.8b (422.7-458.3) | 437.7c (426.2-448.4) | 354.9b,c (334.5-378.1) |
| SD | 158.39 | 153.58 | 116.62 |
| N | 271 | 705 | 115 |
| Median | 436 | 420 | 337 |
| Central 95% | 172-773 | 190-792 | 191-634 |
| Final | Mean (95% CI) | 407.6b (390.4-426.4) | 406.7c (395.5-417.6) | 338.4b,c (316.5-361.3) |
| SD | 158.39 | 148.20 | 122.73 |
| N | 271 | 722 | 115 |
| Median | 396 | 387 | 313 |
| Central 95% | 162-757 | 175-729 | 155-672 |
| Gamma-Glutamyltransferase Activity  (U/L) | Pretreatment | Mean (95% CI) | 58.8 (56.6-61.1) | 58.7 (57.3-60.0) | 54.4 (51.5-57.5) |
| SD | 19.45 | 18.57 | 17.44 |
| N | 265 | 705 | 115 |
| Median | 57 | 56 | 51 |
| Central 95% | 30-104 | 31-102 | 29-103 |
| Final | Mean (95% CI) | 55.0 (52.6-57.4) | 55.5 (54.2-56.9) | 51.7 (48.6-54.8) |
| SD | 20.17 | 18.13 | 17.40 |
| N | 265 | 722 | 115 |
| Median | 53 | 52 | 48 |
| Central 95% | 28-99 | 28-95 | 26-98 |
| Creatine Kinase Activity  (U/L) | Pretreatment | Mean (95% CI) | 634.7 (484.7-797.9) | 964.5 (722.2-1262.9) | 382.9 (247.8-562.1) |
| SD | 743.05 | 1874.07 | 478.95 |
| N | 82 | 184 | 30 |
| Median | 317 | 292 | 226 |
| Central 95% | 70-2758 | 88-6442 | 94-2664 |
| Final | Mean (95% CI) | 421.4 (347.8-501.1) | 594.4 (473.9-735.2) | 392.5 (254.8-591.1) |
| SD | 356.66 | 921.30 | 487.03 |
| N | 85 | 184 | 30 |
| Median | 280 | 270 | 230 |
| Central 95% | 97-1298 | 96-3022 | 81-2695 |
| Total Bilirubin Concentration (mg/dL) | Pretreatment | Mean (95% CI) | 0.23 (0.22-0.24) | 0.22 (0.22-0.23) | 0.22 (0.21-0.23) |
| SD | 0.070 | 0.074 | 0.067 |
| N | 271 | 705 | 115 |
| Median | 0.2 | 0.2 | 0.2 |
| Central 95% | 0.1-0.4 | 0.1-0.4 | 0.1-0.4 |
| Final | Mean (95% CI) | 0.23 (0.22-0.23) | 0.21 (0.20-0.22) | 0.21 (0.20-0.22) |
| SD | 0.079 | 0.137 | 0.069 |
| N | 271 | 722 | 115 |
| Median | 0.2 | 0.2 | 0.2 |
| Central 95% | 0.1-0.4 | 0.1-0.4 | 0.1-0.3 |
| Urea Nitrogen Concentration (mg/dL) | Pretreatment | Mean (95% CI) | 21.9 (21.4-22.3) | 21.9 (21.6-22.2) | 21.2 (20.6-21.9) |
| SD | 3.76 | 3.80 | 3.57 |
| N | 271 | 705 | 115 |
| Median | 21 | 22 | 21 |
| Central 95% | 16-30 | 15-30 | 15-29 |
| Final | Mean (95% CI) | 21.6a (21.1-22.1) | 22.3a,c (22.0-22.6) | 20.8c (20.0-21.6) |
| SD | 3.91 | 4.63 | 4.39 |
| N | 271 | 722 | 115 |
| Median | 21 | 22 | 22 |
| Central 95% | 14-30 | 15-31 | 11-31 |
| Creatinine Concentration  (mg/dL) | Pretreatment | Mean (95% CI) | 0.72a,b (0.71-0.73) | 0.69a (0.68-0.70) | 0.68b (0.66-0.70) |
| SD | 0.114 | 0.130 | 0.106 |
| N | 271 | 705 | 115 |
| Median | 0.7 | 0.7 | 0.7 |
| Central 95% | 0.5-1.0 | 0.5-1.0 | 0.5-0.9 |
| Final | Mean (95% CI) | 0.68 (0.67-0.69) | 0.66 (0.65-0.67) | 0.66 (0.64-0.68) |
| SD | 0.105 | 0.120 | 0.114 |
| N | 271 | 722 | 115 |
| Median | 0.7 | 0.7 | 0.7 |
| Central 95% | 0.5-0.9 | 0.5-0.9 | 0.5-0.9 |
| Sodium Concentration  (mEq/L) | Pretreatment | Mean (95% CI) | 149.2a,b (148.9-149.6) | 148.3a,c (148.1-148.5) | 147.3b,c (146.7-147.9) |
| SD | 2.93 | 3.25 | 3.05 |
| N | 271 | 705 | 115 |
| Median | 149 | 148 | 147 |
| Central 95% | 144-156 | 143-156 | 143-154 |
| Final | Mean (95% CI) | 146.7a,b (146.4-147.0) | 146.3a (146.1-146.5) | 145.8b (145.3-146.4) |
| SD | 2.47 | 2.76 | 2.81 |
| N | 271 | 722 | 115 |
| Median | 147 | 146 | 146 |
| Central 95% | 142-153 | 141-152 | 140-152 |
| Potassium Concentration  (mEq/L) | Pretreatment | Mean (95% CI) | 4.78 (4.72-4.84) | 4.73 (4.69-4.77) | 4.77 (4.69-4.86) |
| SD | 0.516 | 0.571 | 0.455 |
| N | 271 | 705 | 115 |
| Median | 4.8 | 4.7 | 4.7 |
| Central 95% | 3.9-6.0 | 3.8-6.0 | 4.0-5.7 |
| Final | Mean (95% CI) | 4.65 (4.59-4.71) | 4.72 (4.68-4.76) | 4.67 (4.57-4.77) |
| SD | 0.495 | 0.549 | 0.575 |
| N | 271 | 722 | 115 |
| Median | 4.6 | 4.7 | 4.6 |
| Central 95% | 3.9-5.7 | 3.8-6.0 | 3.6-6.0 |
| Chloride Concentration  (mEq/L) | Pretreatment | Mean (95% CI) | 108.4a,b (108.1-108.7) | 108.0a (107.7-108.2) | 107.6b (107.2-108.0) |
| SD | 2.58 | 2.87 | 2.49 |
| N | 271 | 705 | 115 |
| Median | 109 | 108 | 108 |
| Central 95% | 103-113 | 103-114 | 102-112 |
| Final | Mean (95% CI) | 107.6 (107.3-107.9) | 107.5 (107.3-107.7) | 107.3 (106.9-107.8) |
| SD | 2.48 | 2.60 | 2.53 |
| N | 271 | 722 | 115 |
| Median | 108 | 107 | 107 |
| Central 95% | 103-113 | 103-113 | 103-112 |
| Calcium Concentration  (mg/dL) | Pretreatment | Mean (95% CI) | 10.35a,b (10.29-10.41) | 10.19a (10.16-10.23) | 10.20b (10.11-10.28) |
| SD | 0.467 | 0.474 | 0.473 |
| N | 271 | 705 | 115 |
| Median | 10.3 | 10.2 | 10.2 |
| Central 95% | 9.5-11.3 | 9.4-11.2 | 9.4-11.3 |
| Final | Mean (95% CI) | 10.10 (10.05-10.16) | 10.07 (10.03-10.11) | 10.01 (9.94-10.09) |
| SD | 0.461 | 0.490 | 0.452 |
| N | 271 | 722 | 115 |
| Median | 10.0 | 10.1 | 10.0 |
| Central 95% | 9.4-11.1 | 9.1-11.1 | 9.2-11.1 |
| Phosphorous Concentration (mg/dL) | Pretreatment | Mean (95% CI) | 5.76a,b (5.64-5.89) | 5.48a (5.41-5.56) | 5.50b (5.33-5.68) |
| SD | 1.076 | 1.057 | 0.946 |
| N | 271 | 705 | 115 |
| Median | 5.8 | 5.4 | 5.5 |
| Central 95% | 3.4-7.8 | 3.4-7.6 | 3.4-7.6 |
| Final | Mean (95% CI) | 5.58 (5.46-5.70) | 5.47 (5.40-5.55) | 5.36 (5.19-5.52) |
| SD | 0.992 | 0.980 | 0.926 |
| N | 271 | 722 | 115 |
| Median | 5.6 | 5.5 | 5.4 |
| Central 95% | 3.9-7.9 | 3.6-7.3 | 3.4-7.4 |
| Total Protein Concentration  (g/dL) | Pretreatment | Mean (95% CI) | 7.25b (7.20-7.29) | 7.25c (7.22-7.28) | 7.36b,c (7.27-7.44) |
| SD | 0.398 | 0.425 | 0.450 |
| N | 271 | 705 | 115 |
| Median | 7.2 | 7.2 | 7.3 |
| Central 95% | 6.5-7.9 | 6.5-8.2 | 6.5-8.4 |
| Final | Mean (95% CI) | 7.00 (6.96-7.05) | 7.02 (6.99-7.06) | 7.01 (6.93-7.09) |
| SD | 0.428 | 0.466 | 0.441 |
| N | 271 | 722 | 115 |
| Median | 7.0 | 7.0 | 7.0 |
| Central 95% | 6.2-7.9 | 6.1-7.9 | 5.9-7.9 |
| Albumin Concentration  (g/dL) | Pretreatment | Mean (95% CI) | 4.33 (4.30-4.36) | 4.28 (4.26-4.31) | 4.29 (4.24-4.35) |
| SD | 0.290 | 0.318 | 0.325 |
| N | 271 | 712 | 115 |
| Median | 4.3 | 4.3 | 4.3 |
| Central 95% | 3.7-4.9 | 3.6-4.9 | 3.6-5.0 |
| Final | Mean (95% CI) | 4.12 (4.08-4.15) | 4.09 (4.07-4.12) | 4.08 (4.02-4.13) |
| SD | 0.319 | 0.348 | 0.322 |
| N | 271 | 726 | 115 |
| Median | 4.2 | 4.1 | 4.1 |
| Central 95% | 3.4-4.7 | 3.4-4.7 | 3.4-4.7 |
| Globulin Concentration  (g/dL) | Pretreatment | Mean (95% CI) | 2.95 (2.87-3.03) | 2.97 (2.94-3.01) | 3.05 (2.98-3.13) |
| SD | 0.313 | 0.357 | 0.405 |
| N | 58 | 443 | 110 |
| Median | 3.0 | 3.0 | 3.1 |
| Central 95% | 2.1-3.4 | 2.3-3.7 | 2.2-3.9 |
| Final | Mean (95% CI) | 2.92 (2.80-3.05) | 2.94 (2.90-2.98) | 2.91 (2.85-2.98) |
| SD | 0.434 | 0.404 | 0.357 |
| N | 47 | 437 | 108 |
| Median | 2.9 | 2.9 | 2.9 |
| Central 95% | 2.4-3.5 | 2.2-3.7 | 2.2-3.6 |
| Albumin/Globulin  (ratio) | Pretreatment | Mean (95% CI) | 1.50 (1.45-1.56) | 1.47 (1.45-1.49) | 1.45 (1.40-1.50) |
| SD | 0.218 | 0.220 | 0.268 |
| N | 58 | 443 | 110 |
| Median | 1.5 | 1.4 | 1.4 |
| Central 95% | 1.2-2.0 | 1.1-2.0 | 1.0-2.0 |
| Final | Mean (95% CI) | 1.46 (1.39-1.53) | 1.42 (1.40-1.44) | 1.43 (1.39-1.47) |
| SD | 0.240 | 0.240 | 0.220 |
| N | 47 | 437 | 108 |
| Median | 1.4 | 1.4 | 1.4 |
| Central 95% | 1.2-2.0 | 1.0-1.9 | 1.1-1.9 |
| Cholesterol Concentration  (mg/dL) | Pretreatment | Mean (95% CI) | 141.3 (138.0-144.7) | 138.5 (136.8-140.3) | 136.1 (131.4-141.5) |
| SD | 27.41 | 24.88 | 28.74 |
| N | 271 | 705 | 115 |
| Median | 141 | 138 | 134 |
| Central 95% | 93-194 | 94-193 | 88-201 |
| Final | Mean (95% CI) | 131.7 (128.5-135.1) | 132.3 (130.4-134.0) | 132.0 (127.6-136.7) |
| SD | 26.46 | 25.06 | 26.53 |
| N | 271 | 722 | 115 |
| Median | 130 | 130 | 130 |
| Central 95% | 85-185 | 87-186 | 84-183 |
| Triglyceride Concentration  (mg/dL) | Pretreatment | Mean (95% CI) | 46.4 (44.6-48.1) | 48.3 (46.9-50.4) | 48.0 (45.3-50.9) |
| SD | 14.77 | 22.47 | 15.88 |
| N | 265 | 705 | 115 |
| Median | 43 | 46 | 46 |
| Central 95% | 26-82 | 26-80 | 26-97 |
| Final | Mean (95% CI) | 44.9a (42.8-46.9) | 49.2a (47.8-50.9) | 47.8 (45.1-50.6) |
| SD | 16.72 | 21.32 | 15.16 |
| N | 265 | 722 | 115 |
| Median | 42 | 45 | 44 |
| Central 95% | 24-94 | 25-105 | 21-87 |
| * 95% CI generated via non-parametric bootstrap resampling, n = 1000  aCambodian-Chinese mean pairwise comparison statistically significant  bCambodian-Vietnamese mean pairwise comparison statistically significant  cChinese-Vietnamese mean pairwise comparison statistically significant | | | | | |
